# Supplementary material for: Homology-Based Interactions between Small RNAs and Their Targets Control Dominance Hierarchy of Male Determinant Alleles of Self-Incompatibility in Arabidopsis lyrata
Source: MDPI journal article supplement (doi:10.3390/ijms22136990), 2021-06-29
Supplement: s1 [file s1]

## Supplementary Materials

# Homology-Based Interactions between Small RNAs and Their Targets Control Dominance Hierarchy of Male Determinant Alleles of Self-Incompatibility in *Arabidopsis lyrata*

Shinsuke Yasuda <sup>1,†,‡</sup>, Risa Kobayashi <sup>1,‡</sup>, Toshiro Ito <sup>1</sup>, Yuko Wada <sup>1,\*</sup> and Seiji Takayama <sup>2,\*</sup>

<sup>1</sup> Division of Biological Sciences, Nara Institute of Science and Technology, Nara 630-0192, Japan; shinsuke-yasuda@takii.co.jp (S.Y.); kobayashi.risa.ki7@bs.naist.jp (R.K.); itot@bs.naist.jp (T.I.)

<sup>2</sup> Department of Applied Biological Chemistry, Graduate School of Agricultural and Life Sciences, The University of Tokyo, Tokyo 113-8657, Japan

\* Correspondence: yu-wada@gtc.naist.jp (Y.W.); a-taka@g.ecc.u-tokyo.ac.jp (S.T.)

† Present address: Plant Breeding and Experiment Station, Takii and Company, Limited, Konan, Shiga 520-3231, Japan

‡ These authors contributed equally to this work.

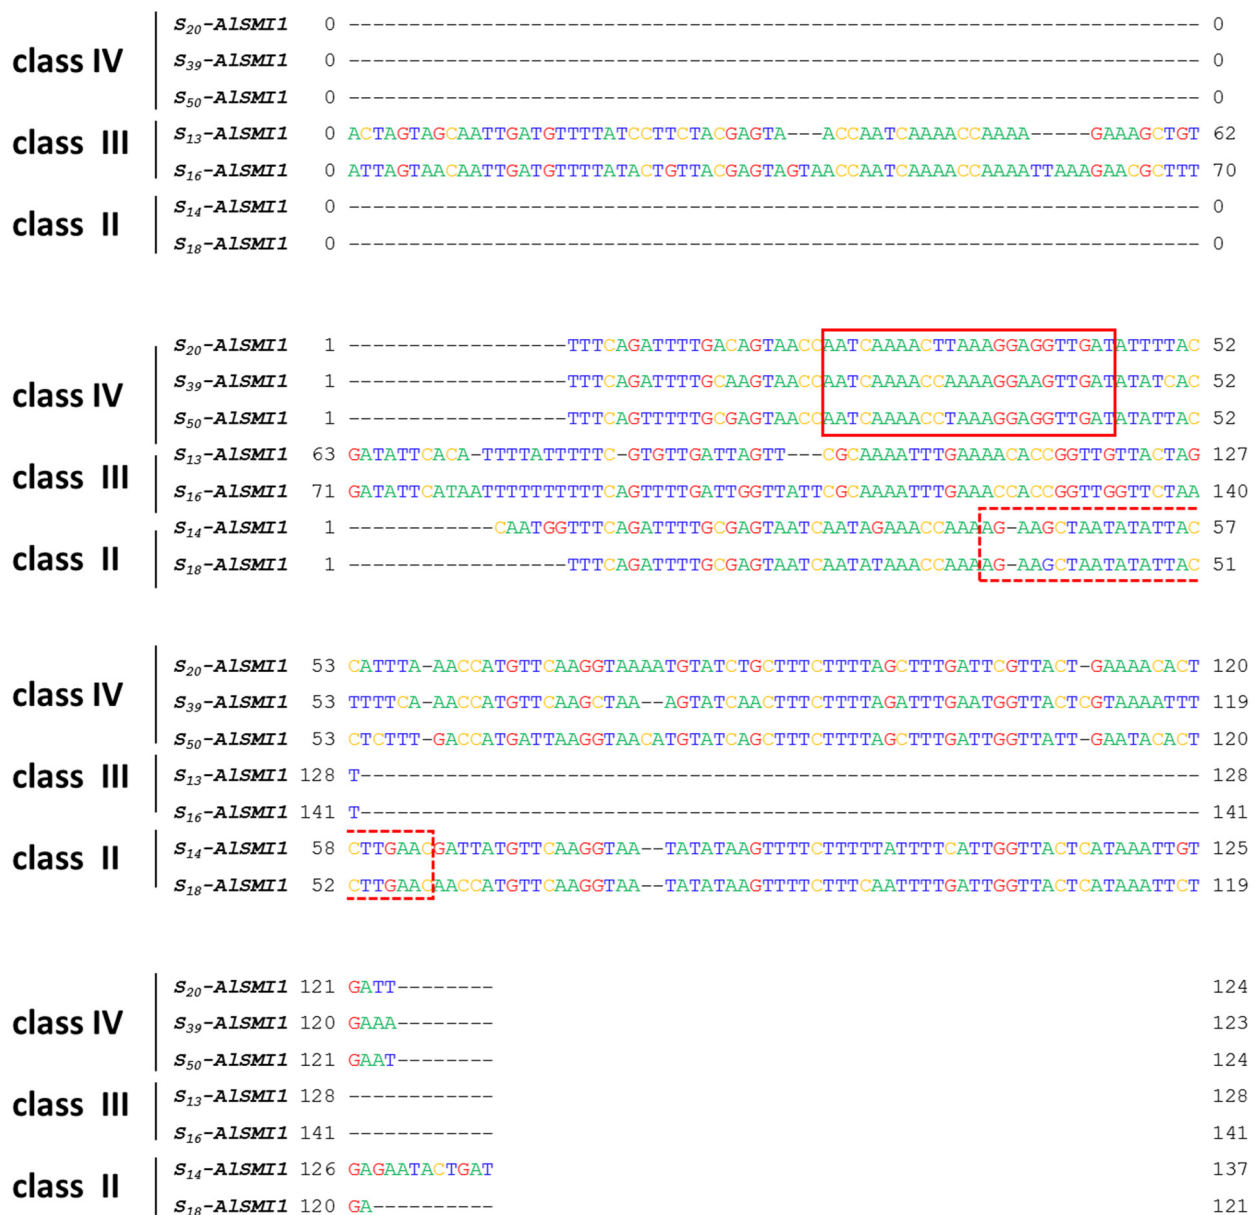

**Supplementary Figure S1.** Sequence alignment of the inverted repeat sequences of *AlSmi1*. Alignment of *S*<sub>20</sub>, *S*<sub>50</sub>, *S*<sub>39</sub>, *S*<sub>13</sub>, *S*<sub>16</sub>, *S*<sub>14</sub>, and *S*<sub>18</sub> haplotypes of *AlSmi1*. Class-IV *AlSmi1*-a sequences and predicted *AlSmi1*-b sequences are highlighted by solid and dashed red boxes, respectively.

## class IV

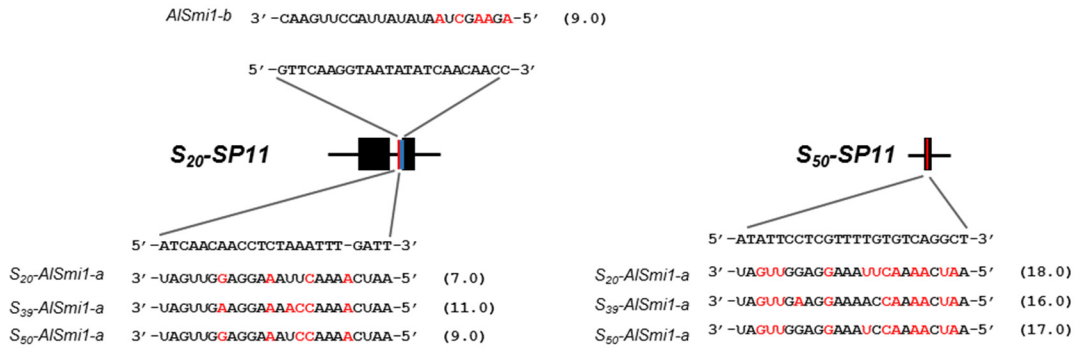

## class III

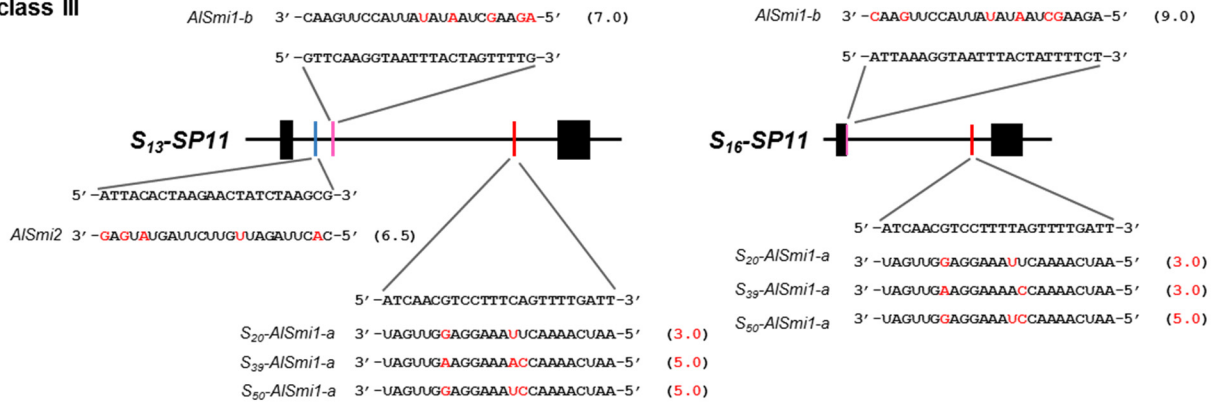

## class II

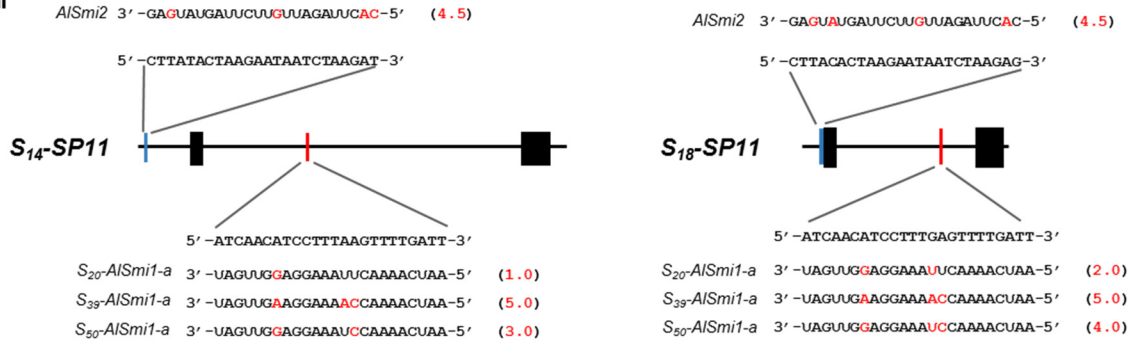

## class I

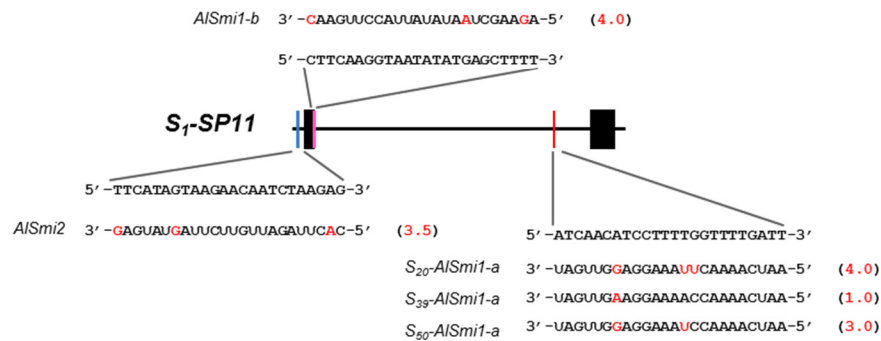

**Supplementary Figure S2.** Genomic regions of the class-IV, class-III, class-II, and class-I *S* haplotypes of *SP11*, and sequence similarity between sRNAs and their *SP11* target sites. Schematic diagram of haplotypes *S<sub>20</sub>*, *S<sub>50</sub>*, *S<sub>13</sub>*, *S<sub>16</sub>*, *S<sub>14</sub>*, *S<sub>18</sub>*, and *S<sub>1</sub>*. Sequences of *S<sub>20</sub>-AlSmi1-a*, *S<sub>39</sub>-AlSmi1-a*, *S<sub>50</sub>-AlSmi1-a*, *AlSmi1-b*, and *AlSmi2* and their sRNA target sites in *SP11* are shown. Black boxes indicate *SP11* exon regions. Red, magenta, and blue boxes indicate target sites of *AlSmi1-a*, *AlSmi1-b*, and *AlSmi2*, respectively. Bases in red indicate mismatches with each *SP11* target site. Numbers in parentheses indicate the mispair scores between each sRNA and the *SP11* target site. Mispair scores <5.5 are shown in red.

**Supplementary Table S1.** Number of sequence reads obtained.

| <b>sRNA</b>                    | <b>Obtained Reads Number</b> |
|--------------------------------|------------------------------|
| <i>S<sub>20</sub>-AlSmi1-a</i> | 100                          |
| <i>S<sub>13</sub>-AlSmi2</i>   | 2889                         |

Results of massively parallel sequencing of *S<sub>20</sub>S<sub>13</sub>* heterozygotes. A total of 44,553,252 bp sequence reads were obtained.
